# Supplementary material for: ‘Communities are attempting to tackle the crisis’: a scoping review on community plans to prevent and reduce opioid-related harms
Source: PubMed Central journal article supplement — BMJ Open. 2019 Sep 12;9(9):e028583. doi: 10.1136/bmjopen-2018-028583 (PMC6747643; doi:10.1136/bmjopen-2018-028583), 2019-09-12
Supplement: bmjopen-2018-028583supp001.pdf [file bmjopen-2018-028583supp001.pdf]

**Supplemental 1.** Full electronic search strategy for OVID MEDLINE

The following search was initially designed by PHO Library Services in Ovid MEDLINE and then adapted to the Ovid platform databases Embase and PsycINFO, and the EBSCOhost databases CINAHL, SocINDEX, and Academic Search Premier, using subject headings and search fields specific to those databases.

Ovid MEDLINE(R) Epub Ahead of Print, In-Process & Other Non-Indexed Citations, Ovid MEDLINE(R) Daily and Ovid MEDLINE(R) 1946 to Present

**Table 1. Search strategy in Ovid MEDLINE**

| # | Searches                                                                                                                                                                                                                                                                                                                                                                                                                                                                                                                                                                                                                                                                                                                  |
|---|---------------------------------------------------------------------------------------------------------------------------------------------------------------------------------------------------------------------------------------------------------------------------------------------------------------------------------------------------------------------------------------------------------------------------------------------------------------------------------------------------------------------------------------------------------------------------------------------------------------------------------------------------------------------------------------------------------------------------|
| 1 | capacity building/ or community health services/ or community-institutional relationships/ or community networks/ or community participation/ or community pharmacy services/ or *cooperative behavior/ or *interinstitutional relations/ or *interprofessional relations/ or *intersectoral collaboration/ or *public-private sector partnerships/                                                                                                                                                                                                                                                                                                                                                                       |
| 2 | ((complex or comprehensive or (hub adj2 spoke*) or multi or multiple or crossinstitution* or cross-institution* or crossorgani#ation* or cross-organi#ation* or inter-organi#ation* or interorgani#ation* or inter-institution* or interinstituion* or multiorgani#ation* or multi-organi#ation*) adj3 (approach* or campaign or campaigns or collaborat* or component* or initiative* or intervention* or involve* or component* or model or models or partner* or pillar* or program* or prong* or policy or policies or project or projects or strategy or strategies)) or multi-component or multicomponent or multi-faceted or multifaceted or multi-prong* or multiprong* or (multiple adj approach*)).kf,kw,ti,ab. |
| 3 | ((city* or cities or communit* or county* or counties or district* or rural or urban or local or neighbo?rhood* or region or regions or regional or town*) adj3 (approach* or campaign or campaigns or collaborat* or component* or co-operation or cooperation or initiative* or intervention* or involve* or model or models or network or networks or partner* or pillar* or program* or prong* or policy or policies or project or projects or strategy or strategies)).ab,ti,kw,kf.                                                                                                                                                                                                                                  |
| 4 | ((opiate* or opioid*) and ((treat* and (prevent* or enforce* or "harm reduction")) or (prevent* and (enforce* or "harm reduction")) or (enforce* and "harm reduction"))).ti,kw,kf.                                                                                                                                                                                                                                                                                                                                                                                                                                                                                                                                        |
| 5 | 1 or 2 or 3 or 4                                                                                                                                                                                                                                                                                                                                                                                                                                                                                                                                                                                                                                                                                                          |
| 6 | ((*Prescription Drug Misuse/ or *substance abuse, intravenous/ or heart arrest/ci or respiratory insufficiency/ci) and (exp Analgesics, Opioid/ or *Designer drugs/ or Fentanyl/ or *street drugs/ or (fentan#1* or heroin* or opiate* or opioid*).ti,kw,kf.)) or exp *Opioid-Related Disorders/ or *Heroin Dependence/ or *Drug overdose/ or exp Analgesics, Opioid/mo, po, to or Fentanyl/mo, po, to or Heroin/mo, po, to or Drug Overdose/dt, pc or Opioid-related disorders/dt, pc or Heroin dependence/dt, pc or *Naloxone/                                                                                                                                                                                          |

| #  | Searches                                                                                                                                                                                                                                                                                                                                                                                                                                                                                                                                                                                                                                                                                                                                                                                                                                                    |
|----|-------------------------------------------------------------------------------------------------------------------------------------------------------------------------------------------------------------------------------------------------------------------------------------------------------------------------------------------------------------------------------------------------------------------------------------------------------------------------------------------------------------------------------------------------------------------------------------------------------------------------------------------------------------------------------------------------------------------------------------------------------------------------------------------------------------------------------------------------------------|
| 7  | (((acetylfentan#l or carfentan#l or diacetylmorph#ne or fentan#l* or heroin or hydromorph#ne or narcotic* or opiate* or opioid* or oxycodone or phentan#l) adj3 (abuse or addicted or addiction* or death* or fatal* or harm* or misuse or overdose*)) and (control* or eliminat* or improve* or improving or lower* or prevent* or reduc*)).ti,kw. or (((acetylfentan#l or carfentan#l or diacetylmorph#ne or fentan#l* or heroin or hydromorph#ne or narcotic* or opiate* or opioid* or oxycodone or phentan#l) adj3 (abuse or addicted or addiction* or death* or fatal* or harm* or misuse or overdose*) adj5 (control* or eliminat* or improve* or improving or lower* or prevent* or reduc*)).ab. and ("in data review" or in process or publisher or "pubmed not medline").st.) or ((opiate or opioid) adj2 (crisis or epidemic or overdose)).ti,kw. |
| 8  | 6 or 7                                                                                                                                                                                                                                                                                                                                                                                                                                                                                                                                                                                                                                                                                                                                                                                                                                                      |
| 9  | ("Canad* drugs and substances strategy" or "Project Lazarus" or "CISUR community guide" or "Toronto Overdose Action Plan" or "META:PHI" or "mentoring education and clinical tools for addiction" or "Cabinet Opiate Action Team" or (Ohio and "opioid overdose prevention")).ab,ti,kw,kf.                                                                                                                                                                                                                                                                                                                                                                                                                                                                                                                                                                  |
| 10 | (5 and 8) or 9                                                                                                                                                                                                                                                                                                                                                                                                                                                                                                                                                                                                                                                                                                                                                                                                                                              |
| 11 | limit 10 to yr="2008 -Current"                                                                                                                                                                                                                                                                                                                                                                                                                                                                                                                                                                                                                                                                                                                                                                                                                              |
| 12 | limit 11 to english                                                                                                                                                                                                                                                                                                                                                                                                                                                                                                                                                                                                                                                                                                                                                                                                                                         |
