# Supplementary material for: ‘Communities are attempting to tackle the crisis’: a scoping review on community plans to prevent and reduce opioid-related harms
Source: PubMed Central journal article supplement — BMJ Open. 2019 Sep 12;9(9):e028583. doi: 10.1136/bmjopen-2018-028583 (PMC6747643; doi:10.1136/bmjopen-2018-028583), 2019-09-12
Supplement: bmjopen-2018-028583supp002.pdf [file bmjopen-2018-028583supp002.pdf]

**Supplemental 2. Scoping review data extraction variables**

| <b>Extraction variable</b>             | <b>Definition</b>                                                                                                                                                                                                                                                                                                                                      |
|----------------------------------------|--------------------------------------------------------------------------------------------------------------------------------------------------------------------------------------------------------------------------------------------------------------------------------------------------------------------------------------------------------|
| Prevention component                   | Interventions that seek to prevent or delay the onset of substance use. Examples include promoting youth protective factors.                                                                                                                                                                                                                           |
| Treatment component                    | Interventions that focus on the treatment of either pain or addiction. Examples include withdrawal management, opioid agonist treatment, guidelines for safer prescribing and patient education on medication safety.                                                                                                                                  |
| Harm reduction component               | Interventions that aim to reduce the social, health, and economic harms of drug use on individuals, families and communities. Examples include overdose education and naloxone distribution, supervised consumption services, and overdose prevention services.                                                                                        |
| Enforcement and justice component      | Interventions designed to strengthen community safety and address issues related to substances. Examples include diversion control of prescribed medication, the Good Samaritan Act, and drug courts.                                                                                                                                                  |
| Enabling component                     | Foundational components that enhance a community's ability to plan and support community members. Focus areas include: (1) data collection and evaluation; (2) education; (3) addressing stigma; (4) social determinants of health; (5) integrated interventions that work across the four pillars; and (6) frontline staff relationship with clients. |
| Community partnership strategies       | Sectors and organizations involved in the development and implementation of the comprehensive community-based intervention, including the roles and structures.                                                                                                                                                                                        |
| Community member engagement strategies | Approaches and methods to engage community members with local planning, including community forums and dialogues                                                                                                                                                                                                                                       |

| <b>Extraction variable</b>        | <b>Definition</b>                                                                                                                                                          |
|-----------------------------------|----------------------------------------------------------------------------------------------------------------------------------------------------------------------------|
| Implementation strategies         | Implementation activities include: (1) assessment; (2) planning; (3) training; (4) coaching; (5) evaluation; (6) organizational development; and (7) systems intervention. |
| Equity considerations             | Adaptations and tailoring of interventions and components to meet the needs of populations.                                                                                |
| Facilitators to development       | Factors that prompt the development of comprehensive community-based plans, including government mandates and local leadership and champions.                              |
| Facilitators to implementation    | Factors that assist with implementation of comprehensive community-based plans, including funding and staff availability.                                                  |
| Barriers to development           | Factors that impede the development of comprehensive community-based plans, including limited resources and attitudinal barriers.                                          |
| Barriers to implementation        | Factors that impede implementation, including competing initiatives and community support and buy-in.                                                                      |
| Individual-level health outcomes  | Outcomes related to the health status of individuals.                                                                                                                      |
| Individual-level process outcomes | Outcome measures that lead, positively or negatively, to a particular health outcome. These include attendance of follow-up appointments, referrals, and treatment.        |
| Community-level health outcomes   | Outcomes related to the aggregated health status of communities, including local mortality and morbidity rates.                                                            |
| Community-level process outcomes  | Outcome measures that lead, positively or negatively, to a particular community-level health outcome. An example is the number of local emergency department visits.       |

| <b>Extraction variable</b>   | <b>Definition</b>                                      |
|------------------------------|--------------------------------------------------------|
| System-level outcomes        | Outcomes related to changes in the health care system. |
| Authors reported conclusions | Conclusions and limitations identified by the author.  |
