# Supplementary material for: ‘Communities are attempting to tackle the crisis’: a scoping review on community plans to prevent and reduce opioid-related harms
Source: PubMed Central journal article supplement — BMJ Open. 2019 Sep 12;9(9):e028583. doi: 10.1136/bmjopen-2018-028583 (PMC6747643; doi:10.1136/bmjopen-2018-028583), 2019-09-12
Supplement: bmjopen-2018-028583supp004.pdf [file bmjopen-2018-028583supp004.pdf]

## Supplement 4. Categorization of Intervention Components

| Intervention Component                                        | No. of 100 plans | Description                                                                                                                                                                                 |
|---------------------------------------------------------------|------------------|---------------------------------------------------------------------------------------------------------------------------------------------------------------------------------------------|
| <b>Prevention (11 categories)</b>                             | 58               | <i>Interventions that seek to prevent or delay the onset of substance use.</i>                                                                                                              |
| Safe disposal of prescription medication                      | 41               | Examples include medication take-back sites/events and campaigns promoting safe disposal.                                                                                                   |
| Youth-based drug prevention education                         | 23               | Substance use prevention education programs and curriculum in schools.                                                                                                                      |
| Family-based prevention strategies                            | 18               | Examples include parent training programs and strategies to mitigate adverse childhood experiences, e.g., healthy families program.                                                         |
| Youth protective factors                                      | 9                | Strategies to enhance factors that mitigate youth substance use, including counselling and social outlets.                                                                                  |
| Substance use prevention messaging and education              | 4                | Public service announcements and campaigns on substance use prevention.                                                                                                                     |
| Pharmacy drug diversion                                       | 9                | Strategies to increase pharmacy participation in safe storage and disposal of medication.                                                                                                   |
| Evidence-based prevention programming                         | 4                | Increasing the availability of evidence-based prevention programs and practices.                                                                                                            |
| Community wellness                                            | 6                | Community mental health promotion activities.                                                                                                                                               |
| Trauma-informed approaches                                    | 3                | Expansion of substance use prevention efforts that focus on trauma in non-healthcare settings.                                                                                              |
| Youth-led prevention programming                              | 2                | Youth-led programs, announcements, and rallies on substance use.                                                                                                                            |
| Workplace prevention policies                                 | 2                | Examples include substance free work policies and work wellness initiatives.                                                                                                                |
| <b>Treatment (27 categories)</b>                              | 96               | <i>Interventions that focus on the treatment of either pain or addiction.</i>                                                                                                               |
| <b>Opioid-use disorder</b>                                    |                  |                                                                                                                                                                                             |
| Including peers in treatment and recovery                     | 15               | Peer involvement for mentorship in treatment and recovery approaches, such as peer recovery coaches.                                                                                        |
| Public education on addiction and available treatment options | 16               | Public education or awareness programs about opioid use disorder and different treatment options. Examples include community based resource maps pertaining to different treatment options. |
| Indigenous treatment interventions                            | 4                | Opioid use disorder treatment programs targeted at Indigenous populations. Examples include culture based and trauma-informed treatment for Indigenous populations.                         |
| Treatment and recovery programs targeted at youth             | 10               | Opioid use disorder treatment and recovery programs targeted at youth. Examples include residential and withdrawal management programs targeted at youth only.                              |
| Family-centered recovery programs or supports                 | 13               | Initiatives that provide support for families to deal with someone battling opioid use disorder as well as, involving families in recovery programs.                                        |
| Naltrexone injection                                          | 3                | Includes naltrexone injection as an option for treatment of opioid use disorder.                                                                                                            |
| Treatment services provided for women                         | 9                | Examples include treatment programs tailored to pregnant women.                                                                                                                             |
| Connecting overdose patients to treatment                     | 20               | Examples include connecting overdose patients to opioid use disorder treatment through hospital ED.                                                                                         |

| <b>Intervention Component</b>                                           | <b>No. of 100 plans</b> | <b>Description</b>                                                                                                                                                                                  |
|-------------------------------------------------------------------------|-------------------------|-----------------------------------------------------------------------------------------------------------------------------------------------------------------------------------------------------|
| System-capacity, coordination                                           | 41                      | Strategies that address system level factors to expand access to opioid use disorder treatment and ensure high quality care for opioid use disorder, including continuum of care models.            |
| Residential programs and treatment beds                                 | 12                      | In-patient/residential treatment services for opioid use disorder and the availability of treatment beds.                                                                                           |
| Increasing access to addiction treatment                                | 69                      | Strategies to increase access to opioid use disorder treatment programs such as Opioid Agonist Therapy (OAT) and Rapid Access to Addiction Medicine (RAAM) clinics                                  |
| Treatment for incarcerated populations                                  | 22                      | Examples include opioid agonist therapy provided in prisons.                                                                                                                                        |
| Trauma-informed care                                                    | 6                       | Trauma-informed opioid use disorder treatment                                                                                                                                                       |
| Insurance coverage for treatment services                               | 7                       | Providing insurance coverage for various opioid use disorder treatments.                                                                                                                            |
| Psychological and social care                                           | 21                      | Treatment for opioid use disorder that integrates psychological (e.g. counselling) treatment component or social supports (e.g.: support from a social worker or opioid case manager).              |
| Healthcare provider education/training on addiction                     | 28                      | Examples include providing training to healthcare providers on various opioid use disorder treatment methods.                                                                                       |
| Screening and referral to treatment                                     | 38                      | Actively screening for people who may have opioid use disorder and referring them to treatment, including SBIRT (Screening, Brief Intervention, and Referral to Treatment) training for physicians. |
| Recovery programs or supports                                           | 18                      | Examples include 12-step meetings and recovery support groups.                                                                                                                                      |
| Withdrawal management services                                          | 22                      | Examples include detoxification programs.                                                                                                                                                           |
| <b>Pain</b>                                                             |                         |                                                                                                                                                                                                     |
| Prescription monitoring programs                                        | 29                      | Utilizing prescription drug monitoring programs to prevent medication diversion and to ensure safe dispensing of opioids.                                                                           |
| Medication safety                                                       | 25                      | Strategies that inform patients on safe opioid use and physician tapering established dose of opioids.                                                                                              |
| Insurance coverage for pain management                                  | 7                       | Providing insurance coverage for interventions that encourage alternative pain management therapies (non-opioid pain management).                                                                   |
| Health care provider education/training on safer prescribing of opioids | 35                      | Education/training programs for healthcare providers on prescribing opioids safely for managing pain.                                                                                               |
| System level factors for safer prescribing of opioids                   | 15                      | Examples include developing and enforcing laws/regulations around safe prescribing of opioids.                                                                                                      |
| Guidelines for safer prescribing of opioids                             | 13                      | Developing and promoting guidelines on managing pain and safer prescribing of opioids.                                                                                                              |
| Organization level factors on safer prescribing of opioids              | 15                      | Strategies that encourage safe prescribing of opioids in an organizational setting, such as opioid prescribing policies in hospitals and ED.                                                        |
| Non-opioid treatments for pain                                          | 28                      | Alternative approaches for pain management including physical therapy, chiropractor etc.                                                                                                            |

| Intervention Component                                                                    | No. of 100 plans | Description                                                                                                                                             |
|-------------------------------------------------------------------------------------------|------------------|---------------------------------------------------------------------------------------------------------------------------------------------------------|
| <b>Harm Reduction (16 categories)</b>                                                     | 93               | <i>Interventions that aims to reduce the social, health, and economic harms of drug use for individuals, families, and communities.</i>                 |
| Provide information about harm reduction services (public and professional)               | 8                | Providing education/informational material to the public and/or providers on available community harm reduction services.                               |
| Increase access and availability of naloxone                                              | 76               | Examples include naloxone distribution at various settings and for specific populations.                                                                |
| Overdose prevention education (public and professionals)                                  | 67               | Overdose recognition and response education/ training (with/without naloxone) to community members.                                                     |
| Access to harm reduction services: needle exchange, needle disposal, infection prevention | 31               | Access to interventions that reduce the risk of blood borne illness.                                                                                    |
| Involvement of peer in harm reduction                                                     | 8                | Engaging people with lived experience of substance use in harm reduction services.                                                                      |
| Supervised consumption services/overdose prevention services                              | 18               | Supervised consumption services/ Overdose prevention sites as an effective harm reduction strategy.                                                     |
| Drug checking services                                                                    | 6                | Expanding and enhancing services that allow testing of drugs to gauge if they contain toxic substances.                                                 |
| Raise awareness on naloxone, overdose, and available resources                            | 14               | Raising awareness about naloxone, overdose, opioid risks and available resources through campaigns and targeted messaging.                              |
| Address bystander fear of calling 911                                                     | 9                | Strategies that encourage public to call 911 in an overdose episode.                                                                                    |
| Outreach programs                                                                         | 8                | Examples include mobile harm reduction services and street outreach programs.                                                                           |
| Toxic substance use alerts                                                                | 3                | Alerting public when harmful substances are found in drugs.                                                                                             |
| Strategies to reach people who use drugs alone                                            | 2                | Strategies that will prevent people who use drugs alone from overdose. Examples include “door lock” program in Winnipeg. <sup>30</sup>                  |
| Indigenous approaches to harm reduction                                                   | 3                | Harm reduction strategies that incorporate indigenous principles (cultural sensitive, trauma-informed).                                                 |
| Safer supply of substances                                                                | 2                | Providing prescription opioids to people who use drugs to prevent overdose, such as hydromorphone distribution programs.                                |
| School and youth harm reduction strategies                                                | 6                | Examples include overdose (naloxone) training in schools.                                                                                               |
| Harm reduction staff support                                                              | 3                | Interventions related to recruiting and providing support to staff working in harm reduction.                                                           |
| <b>Enforcement (9 categories)</b>                                                         | 55               | <i>Interventions designed to strengthen community safety and address issues related to substances.</i>                                                  |
| Police capacity for overdose response                                                     | 26               | Examples include overdose notification systems, occupational health training on fentanyl exposure, overdose response teams, and post-overdose outreach. |
| Good Samaritan Act                                                                        | 20               | Strategies that provide information and promote the Good Samaritan Act.                                                                                 |
| Alternative approaches to arrest                                                          | 15               | Strategies for referral to services rather than arrest.                                                                                                 |
| Diversion control                                                                         | 17               | Enforcement-led safe medication disposal, including events/sites.                                                                                       |

| <b>Intervention Component</b>                 | <b>No. of 100 plans</b> | <b>Description</b>                                                                                                                 |
|-----------------------------------------------|-------------------------|------------------------------------------------------------------------------------------------------------------------------------|
| Focus on drug trafficking                     | 15                      | Strategies that focus on drug networks and organized crime.                                                                        |
| Police-led youth prevention                   | 12                      | School-based substance use presentations, programs, and surveillance.                                                              |
| Treatment or recovery courts                  | 5                       | Directing people in the judicial system to treatment, including jail diversion case management services.                           |
| Police technology equipment                   | 3                       | Measures to detect substances, such as body scanners.                                                                              |
| Training and supports                         | 1                       | Training and education for criminal justice community on public health, substance use, and treatment.                              |
| <b>Enabling (5 categories)</b>                | <b>79</b>               | <b><i>Foundational components that support activities across the pillars of the CDSS.</i></b>                                      |
| Data collection and evaluation                | 55                      | Surveillance, data gathering, data use, and evaluation activities.                                                                 |
| Stigma-reduction initiatives                  | 29                      | Approaches to reduce stigma towards people who use drugs including, awareness-raising campaigns and healthcare provider education. |
| Integrated approaches that address 2+ pillars | 31                      | Examples include incorporating harm reduction principles into treatment approaches.                                                |
| Community education and awareness raising     | 38                      | Public education on opioid use, misuse, and risk.                                                                                  |
| Addressing social determinants of health      | 18                      | Strategies that address housing, income, and other supports for people with lived experience of substance use.                     |
